# Supplementary material
Source: ML conference proceedings conference paper supplement (https://openreview.net/forum?id=gJiOQw1fkF)
Supplement: supplementary_material [file attachment]

## A NETWORK ARCHITECTURE OF SGM FOR TABULAR DATA

In this section, we provide the neural network architecture of score-based generative model for tabular synthesis, which we used in our experiment for SGMs. The network  $F_{\theta_k}(\mathbf{x}(t), t)$  for each  $k$  is as follows:

$$\begin{aligned} \mathbf{h}_0 &= \mathbf{x}(t), \\ \mathbf{h}_i &= \omega(\mathbf{H}_i(\mathbf{h}_{i-1}, t) \oplus \mathbf{h}_{i-1}), 1 \leq i \leq d_L \\ F_{\theta_k}(\mathbf{x}(t), t) &= \text{FC}(\mathbf{h}_{d_L}), \end{aligned}$$

where  $\mathbf{x}(t)$  is a record (or a row) at time  $t$  in tabular data and  $\omega$  is an activation function.  $d_L$  is the number of hidden layers. The layer  $\mathbf{H}_i(\mathbf{h}_{i-1}, t)$  is as follows:

$$\mathbf{H}_i(\mathbf{h}_{i-1}, t) = \text{FC}_i(\mathbf{h}_{i-1}) \odot \psi(\text{FC}_i^{\text{gate}}(t) + \text{FC}_i^{\text{bias}}(t)),$$

where  $\odot$  means the element-wise multiplication,  $\oplus$  means the concatenation operator,  $\psi$  is the Sigmoid function, and FC is a fully connected layer.

The model architecture is a straightforward adaptation of the score-based generative model proposed by (Song et al., 2021). Therefore, we largely utilize the framework of (Song et al., 2021), with modifications made to the data input module to suit tabular data. Additionally, for the composition of layers, we strictly adhere to the approach used in CTGAN, a successful method for tabular data synthesis. Since we have borrowed a substantial portion of the implementation from existing methods, we do not claim that designing the architecture of SGM for tabular data is our original contribution. For studying our proposed training framework, we use the above SGM.

## B DETAILED EXPERIMENTAL SETTINGS FOR REPRODUCIBILITY

Our software and hardware environments are as follows: UBUNTU 18.04 LTS, PYTHON 3.9.16, PYTORCH 1.10.0, CUDA 11.3, and NVIDIA Driver 470.42.01, i9 CPU, and NVIDIA RTX A5000. Our code for the experiments is mainly based on [https://github.com/yang-song/score\\_sde\\_pytorch](https://github.com/yang-song/score_sde_pytorch) (Apache License 2.0).

### B.1 DATASETS

We use 10 real-world datasets and 8 baselines for our experiments. The descriptions for the datasets are as follows:

1. Absenteeism (Martiniano et al., 2012) predicts the absenteeism time in hours. The dataset consists demographic information.
2. Bank (Moro et al., 2014) is to predict whether a client subscribed a term deposit or not. The dataset contains personal financial situations, e.g., whether the person has housing loan or not.
3. Clave (Vurkac, 2011) is to predict the class to which input music belongs. The class is one of the ‘Neutral’, ‘Reverse Clave’, ‘Forward Clave’, and ‘Incoherent’.
4. Concrete is to calculate strength of cement with 8 variables including characteristics of cement.
5. Contraceptive is to predict the current contraceptive method choice (no use, long-term methods, or short-term methods) of a woman based on her demographic and socio-economic characteristics.
6. Customer consists of information about the telecommunication company’s customers and their groups.
7. Fish (Cassotti et al., 2015) aims to predict the acute aquatic toxicity of 908 chemicals towards fathead minnow by using 6 molecular descriptors that characterize the chemical structure of the compounds.
8. Heart Disease is to predict the presence of heart disease in a patient, which consists of personal health condition.

Table 5: Dataset information used in our experiments. ‘#Train’ and ‘#Test’ are the numbers of training data and test data, respectively, and ‘ $N_C$ ’ and ‘ $N_D$ ’ are the numbers of continuous and discrete columns, respectively.

| Task                  | Datasets      | #Train | #Test | $N_C$ | $N_D$ |
|-----------------------|---------------|--------|-------|-------|-------|
| Binary Classification | Bank          | 36169  | 9042  | 7     | 10    |
|                       | Heart Disease | 815    | 203   | 4     | 10    |
|                       | Spambase      | 3681   | 920   | 57    | 1     |
| Multi Classification  | Clave         | 8639   | 2159  | 0     | 17    |
|                       | Contraceptive | 1179   | 294   | 0     | 10    |
|                       | Customer      | 800    | 200   | 5     | 7     |
|                       | Nursery       | 10368  | 2592  | 0     | 9     |
|                       | Obesity       | 1689   | 422   | 8     | 9     |
| Regression            | Absenteeism   | 592    | 148   | 12    | 9     |
|                       | Concrete      | 824    | 206   | 8     | 1     |
|                       | Fish          | 727    | 181   | 7     | 0     |

9. Nursery (Olave et al., 1989) is to rank applications for nursery schools. The dataset contains the family structures, parents’ occupation, children’s health condition, and so on.
10. Obesity includes data for the estimation of obesity levels in individuals from the countries of Mexico, Peru and Colombia, based on their eating habits and physical condition
11. Spambase (Cranor & LaMacchia, 1998) is a collection of emails labeled as spam or non-spam, with 57 features extracted from the emails to be used in spam filtering.

The statistical information of the datasets is in Table 5. The datasets are available online:

- Absenteeism: <https://archive.ics.uci.edu/ml/datasets/Absenteeism+at+work> (CC BY 4.0)
- Bank: <https://archive.ics.uci.edu/ml/datasets/bank+marketing> (CC BY 4.0)
- Clave: [https://archive.ics.uci.edu/ml/datasets/Firm-Teacher\\_Clave-Direction\\_Classification](https://archive.ics.uci.edu/ml/datasets/Firm-Teacher_Clave-Direction_Classification) (CC BY 4.0)
- Concrete: <https://www.kaggle.com/datasets/prathamtripathi/regression-with-neural-networking> (CC0 1.0)
- Contraceptive: <https://archive.ics.uci.edu/dataset/30/contraceptive+method+choice> (CC BY 4.0)
- Customer: <https://www.kaggle.com/prathamtripathi/customersegmentation> (CC0 1.0)
- Fish: <https://archive.ics.uci.edu/ml/datasets/QSAR+fish+toxicity> (CC BY 4.0)
- Heart Disease: <https://www.kaggle.com/datasets/johnsmith88/heart-disease-dataset> (CC BY 4.0)
- Nursery: <https://www.openml.org/search?type=data&sort=runs&id=26&status=active> (CC BY 4.0)
- Obesity: <https://archive.ics.uci.edu/dataset/544/estimation+of+obesity+levels+based+on+eating+habits+and+physical+condition> (CC BY 4.0)
- Spambase: <https://archive.ics.uci.edu/ml/datasets/Spambase> (CC BY 4.0)

## B.2 BASELINES

The descriptions for the baselines are as follows:

1. MedGAN (Choi et al., 2017) includes non-adversarial losses for discrete medical records.
2. VEEGAN (Srivastava et al., 2017) is a GAN equipped with a reconstructor network, which aims for diverse sampling.
3. CTGAN and TVAE (Xu et al., 2019) handle challenges from the mixed type of variables.
4. TableGAN (Park et al., 2018) is a GAN for tabular data using convolutional neural networks.
5. OCT-GAN (Kim et al., 2021) contains neural networks based on neural ordinary differential equations.
6. RNODE (Finlay et al., 2020) is an advanced flow-based model for image data, and we customize the network to synthesize tabular data.
7. STaSy (Kim et al., 2022a) is a currently proposed score-based generative model for tabular data synthesis.

## B.3 DETAILED EVALUATION METHOD

Table 6: Hyperparameters of the base classifiers/regressors

| Models              | Hyperparameters    | Values                       |
|---------------------|--------------------|------------------------------|
| DecisionTree        | max_depth          | 4, 8, 16, 32                 |
|                     | min_samples_split  | 2, 4, 8                      |
|                     | min_samples_leaf   | 1, 2, 4, 8                   |
| AdaBoost            | n_estimators       | 10, 50, 100, 200             |
| Logistic Regression | solver             | lbfgs                        |
|                     | max_iter           | 10, 50, 100, 200             |
|                     | C                  | 0.01, 0.1, 1.0               |
|                     | tol                | 0.0001, 0.01, 0.1            |
| MLP                 | hidden_layer_sizes | (100, ), (200, ), (100, 100) |
|                     | max_iter           | 50, 100                      |
|                     | alpha              | 0.0001, 0.001                |
| RandomForest        | max_depth          | 8, 16, inf                   |
|                     | min_samples_split  | 2, 4, 8                      |
|                     | min_samples_leaf   | 1, 2, 4, 8                   |
| XGBoost             | n_estimators       | 10, 50, 100                  |
|                     | min_child_weight   | 1, 10                        |
|                     | max_depth          | 5, 10, 20                    |
|                     | gamma              | 0.0, 1.0                     |

The reported scores for TSTR results in the paper are obtained through the following steps:

1. **Dataset Acquisition:** If the dataset was previously used, the existing train-test split was utilized. Otherwise, a new train-test split is performed, with a ratio of 80% for training data and 20% for testing data.
2. **Fake Data Generation:** We generate the same number of fake records to that of the original training set with the generation methods.
3. **Base Classifier/Regressor Training:** Using the training records generated in Step 2, base classifiers/regressors are trained for prediction tasks. The best hyperparameter settings for each classifier/regressor are determined through a parameter search process. For validation, we use the original training data, i.e., training a classifier/regressor with fake data and predict for training data (Yoon et al., 2019; Alaa et al., 2021; Jarrett et al., 2021; Jeon et al., 2022; Kim et al., 2022a). Table 6 summarizes the considered hyperparameters and

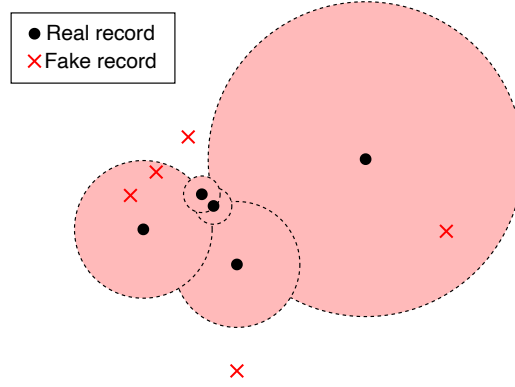

Figure 7: How to calculate coverage. In this example, coverage is  $\frac{2}{5}$  since only two real records (out of five) have nearby fake records.

their candidate settings. The classifiers/regressors vary depending on the task: Decision-Tree, AdaBoost, Logistic Regression, MLP classifiers, RandomForest, and XGBoost are used for binary classification tasks; DecisionTree, MLP classifiers, RandomForest, and XGBoost for multi-class classification tasks; MLP regressor, RandomForest, and XGBoost for regression tasks.

4. **Testing:** The best-performing classifiers/regressors determined in Step 3 are tested using the testing data. We use various evaluation metrics for rigorous evaluations as reported earlier.

The fourth step is repeated five times for all datasets. Then the average score is calculated for each method and evaluation metric.

To assess diversity, we employ coverage as described in Naeem et al. (2020). Coverage is defined as the proportion of real records that have at least one fake record among their neighboring instances, which are determined using the k-nearest neighbors (k-NN) algorithm. In Fig. 7, we present an illustrative example of coverage calculation with  $k = 1$ . Coverage of the real data is theoretically 1. We determine the hyperparameter  $k$  following the methodology outlined in the original paper, where the coverage of the real data exceeds 0.95. The reported coverage scores are the averaged scores after evaluate five times as well.

Detailed metrics for our experiments are as follows:

1. Binary F1 for binary classification datasets: `f1_score` from `sklearn.metrics` after setting the ‘average’ option to ‘binary’.
2. Macro F1 for multi-class classification datasets: `f1_score` from `sklearn.metrics` after setting the ‘average’ option to ‘macro’.
3. AUROC: `roc_auc_score` from `sklearn.metrics`.
4.  $R^2$ : `r2_score` from `sklearn.metrics`.
5. RMSE: `mean_squared_error` from `sklearn.metrics` after setting the ‘squared’ option to ‘False’.
6. Coverage: `compute_prdc` from <https://github.com/clovaai/generative-evaluation-prdc>

#### B.4 HYPERPARAMETER SETTINGS FOR GADGET

Hyperparameter settings for the best models are summarized in Table 7. We have three SDE types, which are VE, VP, and sub-VP. We search for  $K$  in  $\{2, 3, 5\}$ , and use a learning rate in  $\{1e-04, 5e-04, 1e-03, 5e-03\}$ . We use  $\gamma_{min}$  in  $\{0.01, 0.1, 1.0\}$  and  $\gamma_{max}$  in  $\{5.0, 10.0\}$ , which are parameters for  $\gamma(t) = \gamma_{min} + t(\gamma_{max} - \gamma_{min})$  for  $t \in [0, 1]$ .

For the fine-tuning process, we consider a fine-tune learning rate in  $\{i \times 10^{-j} | i = \{1, 2, 5\}, j = \{4, 5, 6, 7, 8, 9\}\}$ .

Table 7: The best hyperparameters used for our experiments

| Datasets      | $K$ | Learning rate | SDE type | $\gamma_{min}$ | $\gamma_{max}$ |
|---------------|-----|---------------|----------|----------------|----------------|
| Absenteeism   | 5   | 1E-03         | sub-VP   | 0.01           | 5.0            |
| Bank          | 3   | 5E-04         | sub-VP   | 0.01           | 5.0            |
| Clave         | 3   | 1E-03         | VP       | 0.1            | 5.0            |
| Concrete      | 2   | 5E-03         | sub-VP   | 0.1            | 5.0            |
| Contraceptive | 2   | 1E-03         | VP       | 0.01           | 5.0            |
| Customer      | 3   | 1E-04         | VP       | 0.1            | 10.0           |
| Fish          | 2   | 5E-03         | sub-VP   | 0.1            | 10.0           |
| Heart Disease | 3   | 5E-03         | sub-VP   | 0.01           | 5.0            |
| Nursery       | 5   | 5E-04         | VP       | 1.0            | 5.0            |
| Obesity       | 2   | 1E-03         | VP       | 0.01           | 5.0            |
| Spambase      | 2   | 1E-03         | sub-VP   | 0.1            | 5.0            |

## C ADDITIONAL EXPERIMENTAL RESULTS

We provide full experimental results in terms of the generative learning trilemma. We measure the metrics five times with different fake data by each method and report their mean and standard deviation.

### C.1 SAMPLING QUALITY

Table 8: Full experimental results in terms of the sampling quality for binary classification datasets. The best result is highlighted in bold face.

| Methods      | Bank        |             | Heart Disease |             | Spambase    |             |
|--------------|-------------|-------------|---------------|-------------|-------------|-------------|
|              | Binary F1   | AUROC       | Binary F1     | AUROC       | Binary F1   | AUROC       |
| Identity     | 0.520±0.038 | 0.895±0.080 | 0.972±0.057   | 0.990±0.025 | 0.935±0.026 | 0.983±0.017 |
| MedGAN       | 0.000±0.000 | 0.500±0.000 | 0.594±0.067   | 0.659±0.061 | 0.000±0.000 | 0.500±0.000 |
| VEEGAN       | 0.206±0.015 | 0.521±0.061 | 0.526±0.126   | 0.453±0.114 | 0.464±0.174 | 0.421±0.130 |
| CTGAN        | 0.515±0.029 | 0.883±0.022 | 0.611±0.015   | 0.543±0.040 | 0.778±0.027 | 0.898±0.039 |
| CTGAN-GADGET | 0.533±0.012 | 0.874±0.033 | 0.797±0.029   | 0.884±0.052 | 0.793±0.061 | 0.920±0.054 |
| TVAE         | 0.524±0.019 | 0.870±0.026 | 0.745±0.056   | 0.843±0.069 | 0.743±0.026 | 0.887±0.060 |
| TableGAN     | 0.444±0.060 | 0.812±0.074 | 0.767±0.023   | 0.868±0.039 | 0.758±0.076 | 0.902±0.082 |
| OCT-GAN      | 0.539±0.019 | 0.887±0.020 | 0.649±0.033   | 0.733±0.056 | 0.850±0.030 | 0.943±0.044 |
| RNODE        | 0.263±0.043 | 0.739±0.083 | 0.815±0.036   | 0.894±0.055 | 0.833±0.049 | 0.935±0.030 |
| RNODE-GADGET | 0.193±0.128 | 0.780±0.099 | 0.823±0.029   | 0.901±0.030 | 0.839±0.067 | 0.941±0.051 |
| SGM          | 0.562±0.041 | 0.907±0.030 | 0.838±0.033   | 0.926±0.025 | 0.890±0.031 | 0.964±0.026 |
| STaSy        | 0.562±0.022 | 0.905±0.017 | 0.835±0.031   | 0.918±0.025 | 0.901±0.028 | 0.969±0.024 |
| SGM-GADGET   | 0.567±0.031 | 0.915±0.019 | 0.875±0.036   | 0.936±0.047 | 0.901±0.024 | 0.969±0.018 |

Table 9: Full experimental results in terms of the sampling quality for multiclass classification datasets. The best result is highlighted in bold face.

| Methods      | Clave       |             | Contraceptive |             | Customer    |             | Nursery     |             | Obesity     |             |
|--------------|-------------|-------------|---------------|-------------|-------------|-------------|-------------|-------------|-------------|-------------|
|              | Macro F1    | AUROC       | Macro F1      | AUROC       | Macro F1    | AUROC       | Macro F1    | AUROC       | Macro F1    | AUROC       |
| Identity     | 0.703±0.099 | 0.916±0.059 | 0.466±0.016   | 0.679±0.020 | 0.370±0.022 | 0.669±0.021 | 0.795±0.005 | 0.999±0.002 | 0.966±0.013 | 0.997±0.004 |
| MedGAN       | 0.245±0.031 | 0.647±0.022 | 0.382±0.002   | 0.590±0.011 | 0.210±0.043 | 0.493±0.030 | 0.097±0.000 | 0.500±0.000 | 0.040±0.000 | 0.500±0.000 |
| VEEGAN       | 0.144±0.000 | 0.500±0.000 | 0.175±0.000   | 0.500±0.000 | 0.105±0.000 | 0.500±0.000 | 0.097±0.000 | 0.500±0.000 | 0.040±0.000 | 0.500±0.000 |
| CTGAN        | 0.483±0.040 | 0.766±0.044 | 0.304±0.013   | 0.497±0.007 | 0.247±0.013 | 0.521±0.011 | 0.526±0.828 | 0.828±0.022 | 0.137±0.004 | 0.508±0.007 |
| CTGAN-GADGET | 0.489±0.066 | 0.790±0.077 | 0.413±0.018   | 0.611±0.025 | 0.289±0.023 | 0.573±0.032 | 0.541±0.026 | 0.877±0.030 | 0.506±0.037 | 0.872±0.017 |
| TVAE         | 0.524±0.050 | 0.812±0.055 | 0.383±0.006   | 0.593±0.009 | 0.140±0.006 | 0.518±0.005 | 0.097±0.000 | 0.500±0.000 | 0.454±0.042 | 0.840±0.017 |
| TableGAN     | 0.331±0.008 | 0.590±0.007 | 0.343±0.011   | 0.577±0.004 | 0.241±0.008 | 0.512±0.005 | 0.294±0.010 | 0.697±0.029 | 0.316±0.028 | 0.782±0.007 |
| OCT-GAN      | 0.498±0.047 | 0.791±0.057 | 0.390±0.011   | 0.594±0.012 | 0.227±0.015 | 0.493±0.003 | 0.587±0.009 | 0.866±0.021 | 0.445±0.024 | 0.797±0.018 |
| RNODE        | 0.449±0.029 | 0.764±0.039 | 0.419±0.026   | 0.625±0.029 | 0.314±0.018 | 0.610±0.038 | 0.293±0.024 | 0.599±0.030 | 0.461±0.024 | 0.846±0.022 |
| RNODE-GADGET | 0.481±0.033 | 0.776±0.040 | 0.410±0.037   | 0.641±0.026 | 0.319±0.027 | 0.604±0.048 | 0.350±0.029 | 0.670±0.047 | 0.485±0.056 | 0.862±0.024 |
| SGM          | 0.595±0.072 | 0.879±0.066 | 0.427±0.012   | 0.639±0.028 | 0.310±0.015 | 0.616±0.026 | 0.482±0.024 | 0.827±0.010 | 0.878±0.028 | 0.983±0.015 |
| STaSy        | 0.587±0.069 | 0.871±0.072 | 0.447±0.023   | 0.655±0.028 | 0.338±0.037 | 0.635±0.044 | 0.566±0.035 | 0.862±0.011 | 0.905±0.025 | 0.984±0.019 |
| SGM-GADGET   | 0.607±0.080 | 0.863±0.061 | 0.447±0.009   | 0.645±0.034 | 0.362±0.020 | 0.637±0.042 | 0.719±0.016 | 0.851±0.040 | 0.917±0.032 | 0.982±0.026 |

Table 10: Full experimental results in terms of the sampling quality for regression datasets. The best result is highlighted in bold face.

| Methods      | Absenteeism  |             | Concrete     |             | Fish         |             |
|--------------|--------------|-------------|--------------|-------------|--------------|-------------|
|              | $R^2$        | RMSE        | $R^2$        | RMSE        | $R^2$        | RMSE        |
| Identity     | 0.385±0.028  | 0.775±0.018 | 0.900±0.048  | 0.181±0.044 | 0.610±0.019  | 0.291±0.007 |
| MedGAN       | -4.289±3.011 | 2.215±0.618 | -0.027±0.075 | 0.589±0.022 | -0.151±0.126 | 0.497±0.027 |
| VEEGAN       | -5.413±5.694 | 2.327±1.128 | -2.710±2.218 | 1.065±0.335 | -0.228±0.163 | 0.508±0.028 |
| CTGAN        | -0.063±0.047 | 1.018±0.022 | 0.063±0.052  | 0.562±0.014 | 0.011±0.128  | 0.462±0.030 |
| CTGAN-GADGET | -0.068±0.081 | 1.020±0.038 | 0.318±0.046  | 0.480±0.016 | 0.397±0.066  | 0.361±0.020 |
| TVAE         | -0.960±0.131 | 1.383±0.045 | 0.207±0.132  | 0.516±0.041 | 0.214±0.086  | 0.411±0.021 |
| TableGAN     | -0.292±0.245 | 1.119±0.109 | 0.388±0.073  | 0.454±0.026 | 0.527±0.020  | 0.320±0.007 |
| OCT-GAN      | -0.042±0.041 | 1.009±0.020 | 0.017±0.025  | 0.576±0.008 | 0.129±0.125  | 0.433±0.031 |
| RNODE        | 0.016±0.029  | 0.980±0.015 | 0.783±0.009  | 0.271±0.005 | 0.532±0.010  | 0.318±0.004 |
| RNODE-GADGET | 0.783±0.016  | 0.775±0.003 | 0.389±0.002  | 0.656±0.015 | 0.548±0.011  | 0.313±0.004 |
| SGM          | 0.036±0.060  | 0.969±0.030 | -0.205±0.641 | 0.612±0.186 | 0.396±0.023  | 0.361±0.007 |
| STaSy        | 0.016±0.085  | 0.980±0.042 | 0.833±0.011  | 0.238±0.008 | 0.574±0.017  | 0.304±0.006 |
| SGM-GADGET   | 0.167±0.027  | 0.902±0.015 | 0.835±0.022  | 0.236±0.016 | 0.548±0.005  | 0.313±0.002 |

## C.2 SAMPLING DIVERSITY

Table 11: Full experimental results in terms of the sampling diversity for binary classification dataset. We use coverage to evaluate the diversity of the generated datasets. The best result is highlighted in bold face.

| Methods      | Bank              | Heart Disease     | Spambase          |
|--------------|-------------------|-------------------|-------------------|
| MedGAN       | 0.000 $\pm$ 0.000 | 0.090 $\pm$ 0.011 | 0.001 $\pm$ 0.000 |
| VEEGAN       | 0.001 $\pm$ 0.000 | 0.004 $\pm$ 0.000 | 0.002 $\pm$ 0.000 |
| CTGAN        | 0.774 $\pm$ 0.001 | 0.098 $\pm$ 0.010 | 0.455 $\pm$ 0.011 |
| CTGAN-GADGET | 0.605 $\pm$ 0.000 | 0.192 $\pm$ 0.014 | 0.265 $\pm$ 0.004 |
| TVAE         | 0.783 $\pm$ 0.003 | 0.287 $\pm$ 0.010 | 0.695 $\pm$ 0.007 |
| TableGAN     | 0.623 $\pm$ 0.004 | 0.816 $\pm$ 0.031 | 0.598 $\pm$ 0.009 |
| OCT-GAN      | 0.623 $\pm$ 0.004 | 0.004 $\pm$ 0.000 | 0.552 $\pm$ 0.010 |
| RNODE        | 0.403 $\pm$ 0.003 | 0.780 $\pm$ 0.017 | 0.281 $\pm$ 0.006 |
| RNODE-GADGET | 0.566 $\pm$ 0.002 | 0.675 $\pm$ 0.027 | 0.296 $\pm$ 0.006 |
| SGM          | 0.702 $\pm$ 0.003 | 0.772 $\pm$ 0.023 | 0.347 $\pm$ 0.003 |
| STaSy        | 0.854 $\pm$ 0.012 | 0.839 $\pm$ 0.009 | 0.764 $\pm$ 0.004 |
| SGM-GADGET   | 0.865 $\pm$ 0.003 | 0.895 $\pm$ 0.014 | 0.727 $\pm$ 0.008 |

Table 12: Full experimental results in terms of the sampling diversity for multiclass classification datasets. We use coverage to evaluate the diversity of the generated datasets. The best result is highlighted in bold face.

| Methods      | Clave             | Contraceptive     | Customer          | Nursery           | Obesity           |
|--------------|-------------------|-------------------|-------------------|-------------------|-------------------|
| MedGAN       | 0.094 $\pm$ 0.003 | 0.563 $\pm$ 0.015 | 0.015 $\pm$ 0.001 | 0.079 $\pm$ 0.001 | 0.000 $\pm$ 0.000 |
| VEEGAN       | 0.208 $\pm$ 0.003 | 0.005 $\pm$ 0.001 | 0.003 $\pm$ 0.000 | 0.002 $\pm$ 0.000 | 0.000 $\pm$ 0.000 |
| CTGAN        | 0.482 $\pm$ 0.002 | 0.721 $\pm$ 0.010 | 0.428 $\pm$ 0.013 | 0.185 $\pm$ 0.004 | 0.276 $\pm$ 0.005 |
| CTGAN-GADGET | 0.709 $\pm$ 0.003 | 0.587 $\pm$ 0.020 | 0.398 $\pm$ 0.010 | 0.468 $\pm$ 0.003 | 0.248 $\pm$ 0.007 |
| TVAE         | 0.709 $\pm$ 0.003 | 0.469 $\pm$ 0.011 | 0.398 $\pm$ 0.010 | 0.468 $\pm$ 0.003 | 0.359 $\pm$ 0.009 |
| TableGAN     | 0.239 $\pm$ 0.003 | 0.758 $\pm$ 0.009 | 0.896 $\pm$ 0.013 | 0.262 $\pm$ 0.003 | 0.353 $\pm$ 0.004 |
| OCT-GAN      | 0.499 $\pm$ 0.004 | 0.531 $\pm$ 0.005 | 0.073 $\pm$ 0.009 | 0.241 $\pm$ 0.005 | 0.296 $\pm$ 0.011 |
| RNODE        | 0.656 $\pm$ 0.002 | 0.678 $\pm$ 0.014 | 0.721 $\pm$ 0.020 | 0.244 $\pm$ 0.002 | 0.303 $\pm$ 0.008 |
| RNODE-GADGET | 0.641 $\pm$ 0.005 | 0.755 $\pm$ 0.014 | 0.621 $\pm$ 0.018 | 0.267 $\pm$ 0.004 | 0.329 $\pm$ 0.012 |
| SGM          | 0.768 $\pm$ 0.005 | 0.768 $\pm$ 0.005 | 0.443 $\pm$ 0.017 | 0.255 $\pm$ 0.004 | 0.591 $\pm$ 0.020 |
| STaSy        | 0.397 $\pm$ 0.003 | 0.875 $\pm$ 0.013 | 0.713 $\pm$ 0.025 | 0.411 $\pm$ 0.003 | 0.633 $\pm$ 0.007 |
| SGM-GADGET   | 0.715 $\pm$ 0.003 | 0.897 $\pm$ 0.009 | 0.745 $\pm$ 0.016 | 0.523 $\pm$ 0.003 | 0.765 $\pm$ 0.004 |

Table 13: Full experimental results in terms of the sampling diversity for regression datasets. We use coverage to evaluate the diversity of the generated datasets. The best result is highlighted in bold face.

| Methods      | Absenteeism       | Concrete          | Fish              |
|--------------|-------------------|-------------------|-------------------|
| MedGAN       | 0.015 $\pm$ 0.001 | 0.001 $\pm$ 0.000 | 0.024 $\pm$ 0.002 |
| VEEGAN       | 0.000 $\pm$ 0.000 | 0.000 $\pm$ 0.000 | 0.000 $\pm$ 0.000 |
| CTGAN        | 0.266 $\pm$ 0.016 | 0.214 $\pm$ 0.025 | 0.449 $\pm$ 0.016 |
| CTGAN-GADGET | 0.210 $\pm$ 0.024 | 0.148 $\pm$ 0.008 | 0.513 $\pm$ 0.023 |
| TVAE         | 0.119 $\pm$ 0.017 | 0.122 $\pm$ 0.012 | 0.343 $\pm$ 0.014 |
| TableGAN     | 0.262 $\pm$ 0.022 | 0.318 $\pm$ 0.015 | 0.654 $\pm$ 0.026 |
| OCT-GAN      | 0.026 $\pm$ 0.006 | 0.274 $\pm$ 0.020 | 0.396 $\pm$ 0.017 |
| RNODE        | 0.308 $\pm$ 0.013 | 0.426 $\pm$ 0.020 | 0.762 $\pm$ 0.018 |
| RNODE-GADGET | 0.320 $\pm$ 0.016 | 0.415 $\pm$ 0.017 | 0.771 $\pm$ 0.014 |
| SGM          | 0.114 $\pm$ 0.011 | 0.640 $\pm$ 0.021 | 0.758 $\pm$ 0.027 |
| STaSy        | 0.308 $\pm$ 0.010 | 0.758 $\pm$ 0.015 | 0.926 $\pm$ 0.010 |
| SGM-GADGET   | 0.222 $\pm$ 0.012 | 0.552 $\pm$ 0.014 | 0.945 $\pm$ 0.013 |

## C.3 SAMPLING TIME

Table 14: Full experimental results in terms of the sampling time for binary classification datasets. The best result is highlighted in bold face.

| Methods      | Bank                 | Heart Disease         | Spambase             |
|--------------|----------------------|-----------------------|----------------------|
| MedGAN       | 0.0246 $\pm$ 0.0001  | 0.0249 $\pm$ 0.0002   | 0.0398 $\pm$ 0.0017  |
| VEEGAN       | 0.0331 $\pm$ 0.0051  | 0.0271 $\pm$ 0.0016   | 0.0449 $\pm$ 0.0039  |
| CTGAN        | 0.1900 $\pm$ 0.0028  | 0.2479 $\pm$ 0.0020   | 0.3071 $\pm$ 0.0303  |
| CTGAN-GADGET | 0.1485 $\pm$ 0.0005  | 0.1267 $\pm$ 0.0021   | 0.0472 $\pm$ 0.0007  |
| TVAE         | 0.0261 $\pm$ 0.0040  | 0.0208 $\pm$ 0.0001   | 0.0259 $\pm$ 0.0011  |
| TableGAN     | 0.0253 $\pm$ 0.0058  | 0.0110 $\pm$ 0.0002   | 0.0252 $\pm$ 0.0035  |
| OCT-GAN      | 0.8224 $\pm$ 0.0097  | 0.7671 $\pm$ 0.0026   | 1.0986 $\pm$ 0.0270  |
| RNODE        | 79.1960 $\pm$ 3.3833 | 14.4123 $\pm$ 0.2339  | 18.5746 $\pm$ 0.6254 |
| RNODE-GADGET | 19.4909 $\pm$ 0.2691 | 30.2750 $\pm$ 0.6096  | 14.1030 $\pm$ 0.0744 |
| SGM          | 4.7591 $\pm$ 0.2777  | 107.6362 $\pm$ 2.3226 | 5.0813 $\pm$ 0.2084  |
| STaSy        | 13.1132 $\pm$ 0.1283 | 51.6194 $\pm$ 0.4906  | 61.5235 $\pm$ 0.7319 |
| SGM-GADGET   | 10.3983 $\pm$ 0.4351 | 5.2705 $\pm$ 0.1995   | 2.8611 $\pm$ 0.6832  |

Table 15: Full experimental results in terms of the sampling time for multiclass classification datasets. The best result is highlighted in bold face.

| Methods      | Clave                | Contraceptive        | Customer            | Nursery              | Obesity              |
|--------------|----------------------|----------------------|---------------------|----------------------|----------------------|
| MedGAN       | 0.0278 $\pm$ 0.0046  | 0.0247 $\pm$ 0.0000  | 0.0005 $\pm$ 0.0005 | 0.0261 $\pm$ 0.0040  | 0.0265 $\pm$ 0.0046  |
| VEEGAN       | 0.0285 $\pm$ 0.0002  | 0.0218 $\pm$ 0.0006  | 0.0002 $\pm$ 0.0002 | 0.0251 $\pm$ 0.0038  | 0.0261 $\pm$ 0.0055  |
| CTGAN        | 0.1793 $\pm$ 0.0094  | 0.1692 $\pm$ 0.0018  | 0.0104 $\pm$ 0.0104 | 0.1761 $\pm$ 0.0022  | 0.1767 $\pm$ 0.0073  |
| CTGAN-GADGET | 0.1590 $\pm$ 0.0005  | 0.0327 $\pm$ 0.0003  | 0.0032 $\pm$ 0.0032 | 0.0317 $\pm$ 0.0041  | 0.1914 $\pm$ 0.0028  |
| TVAE         | 0.0212 $\pm$ 0.0033  | 0.0188 $\pm$ 0.0002  | 0.0032 $\pm$ 0.0032 | 0.0317 $\pm$ 0.0041  | 0.0210 $\pm$ 0.0043  |
| TableGAN     | 0.0170 $\pm$ 0.0067  | 0.0086 $\pm$ 0.0001  | 0.0001 $\pm$ 0.0001 | 0.0153 $\pm$ 0.0058  | 0.0145 $\pm$ 0.0009  |
| OCT-GAN      | 0.7642 $\pm$ 0.0041  | 7.6209 $\pm$ 0.0472  | 0.0135 $\pm$ 0.0135 | 0.7931 $\pm$ 0.0127  | 4.6496 $\pm$ 0.0229  |
| RNODE        | 11.4688 $\pm$ 0.4156 | 10.8183 $\pm$ 0.3609 | 7.4940 $\pm$ 0.0327 | 10.5633 $\pm$ 0.0193 | 7.0291 $\pm$ 0.0544  |
| RNODE-GADGET | 11.7457 $\pm$ 0.2876 | 34.1074 $\pm$ 1.7643 | 6.3139 $\pm$ 0.0293 | 14.9753 $\pm$ 0.2831 | 15.8296 $\pm$ 0.3052 |
| SGM          | 16.3418 $\pm$ 0.2134 | 5.1752 $\pm$ 0.2526  | 7.7790 $\pm$ 0.2061 | 2.3430 $\pm$ 0.1065  | 5.2210 $\pm$ 0.1218  |
| STaSy        | 3.5149 $\pm$ 0.2292  | 3.2419 $\pm$ 0.2194  | 4.9578 $\pm$ 0.2875 | 3.7901 $\pm$ 0.1784  | 3.8308 $\pm$ 0.0605  |
| SGM-GADGET   | 2.2008 $\pm$ 0.0319  | 3.5827 $\pm$ 0.1936  | 1.6791 $\pm$ 0.1684 | 3.4335 $\pm$ 0.0824  | 2.6244 $\pm$ 0.0568  |

Table 16: Full experimental results in terms of the sampling time for regression datasets. The best result is highlighted in bold face.

| Methods      | Absenteeism          | Concrete            | Fish                |
|--------------|----------------------|---------------------|---------------------|
| MedGAN       | 0.0004 $\pm$ 0.0384  | 0.0261 $\pm$ 0.0051 | 0.0236 $\pm$ 0.0002 |
| VEEGAN       | 0.0022 $\pm$ 0.0316  | 0.0161 $\pm$ 0.0001 | 0.0155 $\pm$ 0.0003 |
| CTGAN        | 0.0017 $\pm$ 0.1986  | 0.0569 $\pm$ 0.0002 | 0.0433 $\pm$ 0.0002 |
| CTGAN-GADGET | 0.1223 $\pm$ 0.0003  | 0.0119 $\pm$ 0.0001 | 0.0184 $\pm$ 0.0001 |
| TVAE         | 0.0013 $\pm$ 0.0224  | 0.0218 $\pm$ 0.0041 | 0.0295 $\pm$ 0.0001 |
| TableGAN     | 0.0002 $\pm$ 0.0145  | 0.0128 $\pm$ 0.0060 | 0.0111 $\pm$ 0.0002 |
| OCT-GAN      | 0.0209 $\pm$ 1.1692  | 0.6801 $\pm$ 0.0053 | 0.4809 $\pm$ 0.0039 |
| RNODE        | 18.3608 $\pm$ 0.1162 | 1.4792 $\pm$ 0.0238 | 0.9925 $\pm$ 0.0246 |
| RNODE-GADGET | 13.5653 $\pm$ 0.2859 | 2.8808 $\pm$ 0.0506 | 1.6716 $\pm$ 0.0194 |
| SGM          | 5.8162 $\pm$ 0.4003  | 3.8166 $\pm$ 0.1268 | 3.6888 $\pm$ 0.1072 |
| STaSy        | 21.4828 $\pm$ 0.1382 | 1.3293 $\pm$ 0.0496 | 1.2404 $\pm$ 0.0055 |
| SGM-GADGET   | 4.7351 $\pm$ 0.1272  | 1.2531 $\pm$ 0.0973 | 0.8905 $\pm$ 0.0502 |

## D SAMPLING COMPLEXITY OF SGM FOR TABULAR DATA VS. SGM-GADGET

**Algorithm 2** *Probability flow* for SGM

**Input** Trained score model  $F_\theta$ , final time  $t_0 = 0$ , start time  $t_1 = 1$ , and a Gaussian prior  $\mathbf{Z} = [\mathbf{z}_1, \mathbf{z}_2, \dots, \mathbf{z}_N]$

**Output** Generated fake data  $\hat{\mathcal{T}} = [\hat{\mathbf{x}}_1, \hat{\mathbf{x}}_2, \dots, \hat{\mathbf{x}}_N]$

---

```

function ode_func ( $[\mathbf{z}_1, \mathbf{z}_2, \dots, \mathbf{z}_N], t$ ):
    for  $i \in \{1, 2, \dots, N\}$  do
         $s_i \leftarrow F_\theta(\mathbf{z}_i, t)$ 
         $\mathbf{r} \leftarrow \mathbf{r} \cup d\mathbf{z}_i/dt$ , where  $d\mathbf{z}_i/dt = \mathbf{f}(\mathbf{z}_i, t) - \frac{1}{2}g^2(t)s_i$ 
    return  $\mathbf{r}$ 
 $[\hat{\mathbf{x}}_1, \hat{\mathbf{x}}_2, \dots, \hat{\mathbf{x}}_N] \leftarrow \text{odeint}(\text{ode\_func}, [\mathbf{z}_1, \mathbf{z}_2, \dots, \mathbf{z}_N], t_0, t_1)$  return  $\hat{\mathcal{T}}$ 

```

---

**Algorithm 3** *Probability flow* for SGM-GADGET

**Input** Trained score models  $F_{\theta_k}$  for all  $k$ , final time  $t_0 = 0$ , start time  $t_1 = 1$ , and a Gaussian prior  $\mathbf{Z} = [\mathbf{z}_1, \mathbf{z}_2, \dots, \mathbf{z}_N]$

**Output** Generated fake data  $\hat{\mathcal{T}} = [\hat{\mathbf{x}}_1, \hat{\mathbf{x}}_2, \dots, \hat{\mathbf{x}}_N]$

---

```

function ode_func ( $[\mathbf{z}_1, \mathbf{z}_2, \dots, \mathbf{z}_N], t$ ):
     $i = 1$  for  $k \in \{1, 2, \dots, K\}$  do
        for  $j \in \{1, 2, \dots, |\mathcal{B}_k|\}$  do
             $s_i \leftarrow F_{\theta_k}(\mathbf{z}_i, t)$ 
             $\mathbf{r} \leftarrow \mathbf{r} \cup d\mathbf{z}_i/dt$ , where  $d\mathbf{z}_i/dt = \mathbf{f}(\mathbf{z}_i, t) - \frac{1}{2}g^2(t)s_i$  //  $\sum_{k=1}^K |\mathcal{B}_k| = N$ 
             $i += 1$ 
    return  $\mathbf{r}$ 
 $[\hat{\mathbf{x}}_1, \hat{\mathbf{x}}_2, \dots, \hat{\mathbf{x}}_N] \leftarrow \text{odeint}(\text{ode\_func}, [\mathbf{z}_1, \mathbf{z}_2, \dots, \mathbf{z}_N], t_0, t_1)$  return  $\hat{\mathcal{T}}$ 

```

---

The sampling process for SGM and SGM-GADGET is illustrated in Algorithms 2 and 3 respectively. As noted earlier, both SGM and SGM-GADGET generate samples through the *probability flow*. The *probability flow* is as follows:

$$d\mathbf{x} = (\mathbf{f}(\mathbf{x}, t) - \frac{1}{2}g^2(t)\nabla_{\mathbf{x}} \log p_t(\mathbf{x}))dt, \quad (8)$$

where  $\mathbf{f}$  is the drift and  $g$  is the diffusion coefficient of  $\mathbf{x}$ , and  $\nabla_{\mathbf{x}} \log p_t(\mathbf{x})$  is approximated by a score network  $F_\theta$  for the *probability flow*.

SGM-GADGET consists of  $K$  SGMs, and one might assume that the sampling complexity of SGM-GADGET is of the order  $K$ . However, it is important to note that i) SGM-GADGET is trained using the *probability flow*, where we generate fake records using the neural ordinary differential equation (NODE) based on  $F_{\theta_k}$ , and ii) each SGM's size can be smaller since it learns a Gaussian-like distribution. By employing an augmented ODE, we are able to generate samples from  $K$  SGMs simultaneously. Therefore, the total complexity can be smaller than existing single SGM-based approaches, e.g., STaSy.

We augment the ODE function with many noisy vectors sampled from a Gaussian prior for both SGM and GADGET. The difference in the sampling process lies within the ODE function itself. In the case of SGM, we iterate over  $N$  inputs using a single SGM  $F_\theta$ . On the other hand, for GADGET, we iterate over  $N$  inputs using  $K$  SGMs  $F_{\theta_k}$ , where each SGM  $F_{\theta_k}$  evaluates the dynamics on  $|\mathcal{B}_k|$  inputs. This process gives us theoretically the same sampling complexity as that of SGM.

As a result, we have faster sampling processes compared to SGM in many cases (cf. Tables 2 and 14 to 16), and the improvement is apparently from the reduction in the number of learnable parameters in score networks (cf. Appendix E).

## E THE NUMBER OF LEARNABLE PARAMETERS

In Table 17 we present the total number of learnable parameters in neural networks for each method. For methods involving multiple neural networks, such as GAN-based methods, we report the sum of the learnable parameters across all networks. Tables 18, 19, 21 to 23 and 26 provide the number of learnable parameters for each network within each baseline method. RNODE and STaSy consist of only one neural network. For SGM-GADGET, the same neural network is used for each of the  $K$  neural networks so they have an equal number of learnable parameters. To have the number of learnable parameters in a single neural network for SGM-GADGET, simply divide the value presented in Table 17 by the corresponding value of  $K$  from Table 7.

As shown in Table 17 the total number of parameters of baselines tends to be proportional to the generation performance, i.e., the sampling quality and diversity — however, our method enhances the performance without increasing the total sum of model parameters. Specifically, STaSy contains the biggest number of parameters and shows the best performance in terms of the generation quality among baselines. Moreover, RNODE, which requires the biggest parameter numbers among the baselines except for the SGM-based methods, performs the best in terms of the sampling quality and the second best in terms of the sampling diversity, excluding the SGM-based methods. Other GAN-based methods are more overfitted to training samples with more parameters in many cases.

Table 17: The total number of learnable parameters in neural networks for each method. For SGM-GADGET, it is the sum of all those  $K$  SGMs' parameter numbers.

| Methods      | Absent.   | Bank       | Clave     | Conc.     | Contra.   | Customer  | Fish      | Heart.     | Nursery   | Obesity   | Spam.     | Average   |
|--------------|-----------|------------|-----------|-----------|-----------|-----------|-----------|------------|-----------|-----------|-----------|-----------|
| MedGAN       | 276,716   | 77,493     | 127,396   | 106,633   | 149,697   | 173,343   | 105,095   | 103,239    | 124,320   | 69,798    | 259,387   | 143,011   |
| VEEGAN       | 171,405   | 143,190    | 76,229    | 120,618   | 149,346   | 74,304    | 173,992   | 152,424    | 190,017   | 76,999    | 146,268   | 134,072   |
| CTGAN        | 885,285   | 700,642    | 306,229   | 153,269   | 287,919   | 203,012   | 232,367   | 705,393    | 400,673   | 355,295   | 1,154,885 | 489,543   |
| CTGAN-GADGET | 153,082   | 47,628     | 83,775    | 38,036    | 63,838    | 38,750    | 37,136    | 93,656     | 60,674    | 42,022    | 60,536    | 65,376    |
| TVAE         | 100,296   | 238,430    | 67,272    | 208,104   | 219,412   | 72,690    | 254,300   | 228,664    | 247,104   | 231,748   | 368,472   | 203,317   |
| TableGAN     | 464,067   | 1,714,563  | 431,299   | 36,739    | 69,507    | 40,707    | 139,011   | 139,011    | 40,707    | 1,649,027 | 1,845,635 | 597,298   |
| OCT-GAN      | 1,571,847 | 1,448,402  | 4,709,195 | 4,742,583 | 4,688,299 | 4,679,376 | 4,676,593 | 4,798,996  | 4,768,835 | 4,827,135 | 1,341,977 | 3,841,203 |
| RNODE        | 4,219,485 | 100,648    | 54,865    | 38,589    | 30,553    | 351,852   | 23,721    | 2,285,097  | 125,569   | 263,715   | 144,197   | 737,458   |
| RNODE-GADGET | 800,714   | 58,726     | 27,650    | 13,716    | 349,444   | 61,755    | 6,358     | 830,420    | 65,538    | 122,212   | 144,434   | 223,257   |
| SGM          | 5,945,404 | 5,542,254  | 5,418,868 | 5,224,090 | 5,629,698 | 5,382,688 | 5,209,720 | 5,673,528  | 5,389,920 | 5,433,354 | 5,585,940 | 5,941,820 |
| 5,542,254    | 5,418,868 | 5,220,506  | 5,629,698 | 5,382,688 | 5,206,136 | 5,673,528 | 5,389,920 | 5,433,354  | 5,585,940 | 5,493,156 |           |           |
| SGM-GADGET   | 2,823,660 | 11,245,962 | 123,804   | 219,316   | 938,372   | 115,104   | 50,288    | 11,584,488 | 381,600   | 1,952,660 | 328,616   | 2,705,806 |

Table 18: The number of learnable parameters in MedGAN for each network

| Networks      | Absenteeism | Bank   | Clave   | Concrete | Contraceptive | Customer | Fish    | Heart   | Disease | Nursery | Obesity | Spam | base |
|---------------|-------------|--------|---------|----------|---------------|----------|---------|---------|---------|---------|---------|------|------|
| Encoder       | 27,904      | 6,912  | 4,736   | 1,280    | 8,448         | 8,192    | 1,024   | 9,216   | 4,224   | 4,992   | 15,360  |      |      |
| Decoder       | 27,756      | 6,837  | 4,644   | 1,161    | 8,385         | 7,967    | 903     | 9,159   | 4,128   | 4,902   | 15,163  |      |      |
| Discriminator | 88,448      | 30,208 | 84,480  | 70,656   | 99,328        | 24,576   | 69,632  | 51,328  | 82,432  | 26,368  | 96,256  |      |      |
| Generator     | 132,608     | 33,536 | 33,536  | 33,536   | 33,536        | 132,608  | 33,536  | 33,536  | 33,536  | 33,536  | 132,608 |      |      |
| Total         | 276,716     | 77,493 | 127,396 | 106,633  | 149,697       | 173,343  | 105,095 | 103,239 | 124,320 | 69,798  | 259,387 |      |      |

Table 19: The number of learnable parameters in VEEGAN for each network

| Networks      | Absenteeism | Bank    | Clave  | Concrete | Contraceptive | Customer | Fish    | Heart   | Disease | Nursery | Obesity | Spam | base |
|---------------|-------------|---------|--------|----------|---------------|----------|---------|---------|---------|---------|---------|------|------|
| Discriminator | 102,145     | 88,065  | 25,473 | 76,801   | 91,137        | 24,833   | 76,289  | 92,673  | 82,689  | 25,729  | 89,601  |      |      |
| Generator     | 34,668      | 27,573  | 25,380 | 21,897   | 29,121        | 24,735   | 76,039  | 29,895  | 82,464  | 25,638  | 28,347  |      |      |
| Reconstructor | 34,592      | 27,552  | 25,376 | 21,920   | 29,088        | 24,736   | 21,664  | 29,856  | 24,864  | 25,632  | 28,320  |      |      |
| Total         | 171,405     | 143,190 | 76,229 | 120,618  | 149,346       | 74,304   | 173,992 | 152,424 | 190,017 | 76,999  | 146,268 |      |      |

Table 20: The number of learnable parameters in CTGAN for each network

| Networks      | Absenteeism | Bank    | Clave   | Concrete | Contraceptive | Customer | Fish    | Heart   | Disease | Nursery | Obesity   | Spam | base |
|---------------|-------------|---------|---------|----------|---------------|----------|---------|---------|---------|---------|-----------|------|------|
| Discriminator | 731,905     | 468,225 | 250,625 | 83,329   | 206,209       | 123,009  | 184,065 | 473,345 | 230,145 | 180,609 | 1,003,265 |      |      |
| Generator     | 153,380     | 232,417 | 55,604  | 69,940   | 81,710        | 80,003   | 48,302  | 232,048 | 170,528 | 174,686 | 151,620   |      |      |
| Total         | 885,285     | 700,642 | 306,229 | 153,269  | 287,919       | 203,012  | 232,367 | 705,393 | 400,673 | 355,295 | 1,154,885 |      |      |

Table 21: The number of learnable parameters in CTGAN-GADGET for each network

| Networks      | Absenteeism | Bank   | Clave  | Concrete | Contraceptive | Customer | Fish   | Heart  | Disease | Nursery | Obesity | Spam | base |
|---------------|-------------|--------|--------|----------|---------------|----------|--------|--------|---------|---------|---------|------|------|
| Discriminator | 21,313      | 4,417  | 13,121 | 9,089    | 5,729         | 3,745    | 8,961  | 16,897 | 12,609  | 4,001   | 12,289  |      |      |
| Generator     | 55,228      | 19,397 | 14,804 | 9,929    | 26,190        | 15,630   | 9,607  | 29,931 | 17,728  | 17,010  | 17,979  |      |      |
| K             | 2           | 2      | 3      | 2        | 2             | 2        | 2      | 2      | 2       | 2       | 2       |      |      |
| Total         | 153,082     | 47,628 | 83,775 | 38,036   | 63,838        | 38,750   | 37,136 | 93,656 | 60,674  | 42,022  | 60,536  |      |      |

Table 22: The number of learnable parameters in TVAE for each network

| Networks | Absenteeism | Bank    | Clave  | Concrete | Contraceptive | Customer | Fish    | Heart   | Disease | Nursery | Obesity | Spam | base |
|----------|-------------|---------|--------|----------|---------------|----------|---------|---------|---------|---------|---------|------|------|
| Encoder  | 54,144      | 127,360 | 37,760 | 112,256  | 117,888       | 40,448   | 143,616 | 122,496 | 140,032 | 124,032 | 192,128 |      |      |
| Decoder  | 46,152      | 111,070 | 29,512 | 95,848   | 101,524       | 32,242   | 110,684 | 106,168 | 107,072 | 107,716 | 176,344 |      |      |
| Total    | 100,296     | 238,430 | 67,272 | 208,104  | 219,412       | 72,690   | 254,300 | 228,664 | 247,104 | 231,748 | 368,472 |      |      |

Table 23: The number of learnable parameters in TableGAN for each network

| Networks      | Absenteeism | Bank      | Clave   | Concrete | Contraceptive | Customer | Fish    | Heart   | Disease | Nursery   | Obesity   | Spam | base |
|---------------|-------------|-----------|---------|----------|---------------|----------|---------|---------|---------|-----------|-----------|------|------|
| Classifier    | 132,993     | 528,129   | 132,993 | 1,409    | 1,409         | 2,817    | 2,817   | 2,817   | 2,817   | 528,129   | 528,129   |      |      |
| Discriminator | 132,993     | 528,129   | 132,993 | 1,409    | 1,409         | 2,817    | 2,817   | 2,817   | 2,817   | 528,129   | 528,129   |      |      |
| Generator     | 198,081     | 658,305   | 165,313 | 33,921   | 66,689        | 35,073   | 133,377 | 133,377 | 35,073  | 592,769   | 789,377   |      |      |
| Total         | 464,067     | 1,714,563 | 431,299 | 36,739   | 69,507        | 40,707   | 139,011 | 139,011 | 40,707  | 1,649,027 | 1,845,635 |      |      |

Table 24: The number of learnable parameters in OCT-GAN for each network

| Networks      | Absenteeism | Bank      | Clave     | Concrete  | Contraceptive | Customer  | Fish      | Heart     | Disease   | Nursery   | Obesity   | Spambase |
|---------------|-------------|-----------|-----------|-----------|---------------|-----------|-----------|-----------|-----------|-----------|-----------|----------|
| Discriminator | 1,167,745   | 1,154,561 | 4,548,353 | 4,543,233 | 4,567,809     | 4,551,169 | 4,541,697 | 4,570,625 | 4,546,305 | 4,562,689 | 1,181,313 |          |
| Generator     | 404,102     | 293,841   | 160,842   | 199,350   | 120,490       | 128,207   | 134,896   | 228,371   | 222,530   | 264,446   | 160,664   |          |
| Total         | 1,571,847   | 1,448,402 | 4,709,195 | 4,742,583 | 4,688,299     | 4,679,376 | 4,676,593 | 4,798,996 | 4,768,835 | 4,827,135 | 1,341,977 |          |

Table 25: The number of learnable parameters in RNODE for each network

| Networks | Absenteeism | Bank    | Clave  | Concrete | Contraceptive | Customer | Fish   | Heart     | Disease | Nursery | Obesity | Spambase |
|----------|-------------|---------|--------|----------|---------------|----------|--------|-----------|---------|---------|---------|----------|
| RNODE    | 4,219,485   | 100,648 | 54,865 | 38,589   | 30,553        | 351,852  | 23,721 | 2,285,097 | 125,569 | 263,715 | 144,197 |          |

Table 26: The number of learnable parameters in RNODE-GADGET for each network

| Networks | Absenteeism | Bank   | Clave  | Concrete | Contraceptive | Customer | Fish  | Heart     | Disease | Nursery | Obesity | Spambase |
|----------|-------------|--------|--------|----------|---------------|----------|-------|-----------|---------|---------|---------|----------|
| RNODE    | 400,357     | 29,363 | 13,825 | 6,858    | 174,722       | 20,585   | 3,179 | 415,210   | 32,769  | 61,106  | 72,217  |          |
| K        | 3           | 2      | 2      | 2        | 2             | 2        | 2     | 5         | 2       | 2       | 5       |          |
| Total    | 1,201,071   | 58,726 | 27,650 | 13,716   | 349,444       | 41,170   | 6,358 | 2,076,050 | 65,538  | 122,212 | 361,085 |          |
